# Supplementary material
Source: PubMed Central journal article supplement (PMC3534455)
Supplement: supp_amiajnl-2011-000779_amiajnl-2011-000779-s1.pdf [file supp_amiajnl-2011-000779_amiajnl-2011-000779-s1.pdf]

## **APPENDICES**

### **Sample questions from think aloud verbal protocols**

- How many medications will the patient receive? (Since e-prescriptions are not bundled when electronically transmitted)
- If the prescription is for Amoxicillin 250mg/5ml #30, is the prescription for 30 ml of liquid suspension or #30 capsules?
- Which quick key or screen do I have to scroll to in order to find the information I need to assess the prescription?
- The prescription directions state “take at bedtime, take three times a day”. Which one is correct?
